# Supplementary material
Source: PubMed Central journal article supplement (PMC9899233)
Supplement: 41541_2023_604_MOESM1_ESM.pdf [file 41541_2023_604_MOESM1_ESM.pdf]

| Score                  | 0                                                                                                                                  | 1                                                                                                                     | 2                                                                                                                      | 3                                                                                                             | 4                                                                                                          |
|------------------------|------------------------------------------------------------------------------------------------------------------------------------|-----------------------------------------------------------------------------------------------------------------------|------------------------------------------------------------------------------------------------------------------------|---------------------------------------------------------------------------------------------------------------|------------------------------------------------------------------------------------------------------------|
| Myocardium<br>(X200)   | Diffuse, individual cells throughout tissue<br>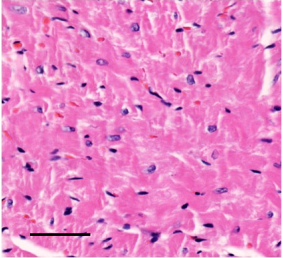   | 1-2 small foci<br>                  | >2 small foci<br>                   | Large focal lesion<br>     | Aschoff-type lesion<br> |
| Mitral valve<br>(X200) | No inflammatory cells associated with valves<br> | <5 isolated cells in/on valves<br> | >5 cells on valve surface only<br> | Focal lesion in valve<br> | >1 lesion<br>          |

**Supplementary Table 1.** Carditis score. Formalin fixed paraffin embedded sections were stained with haematoxylin and eosin (H&E) using standard protocols. Stained tissue were examined for evidence of valvulitis and myocarditis. Observation under microscope of inflammatory cell infiltration into tissue was performed double blinded using 5 different sections of the myocardium and the mitral valve from each rat. Individual scores (0-4) for both myocardial and valvular tissue were summed to derive at the “carditis” score. Scale bar represents 50µm.

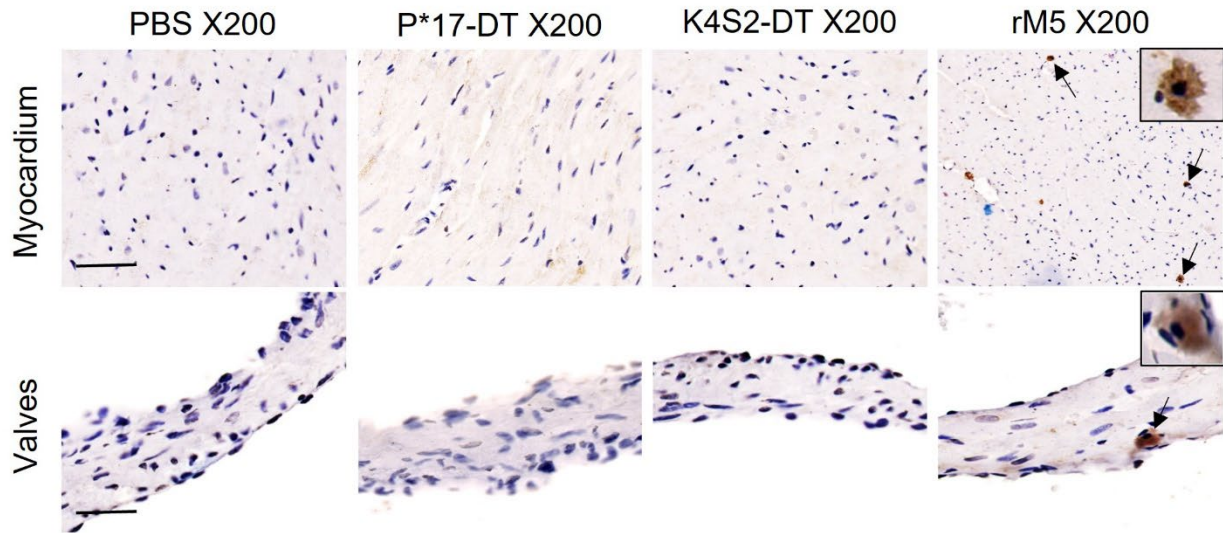

**Supplementary Figure 1.** Tissue specific localisation of IL-17A. Presence of IL-17A in the myocardium and valvular tissues of rats was investigated by immunohistochemical staining. No evidence of cellular infiltration of IL-17A was observed in the PBS control, P\*17-DT and K4S2-DT treated rats. In contrast, IL-17A was detected in rM5 treated rats (arrows). Representative images from two rats in each group given. Images magnified at x200, snippets magnified at x400 and scale bar represents 50  $\mu$ m.

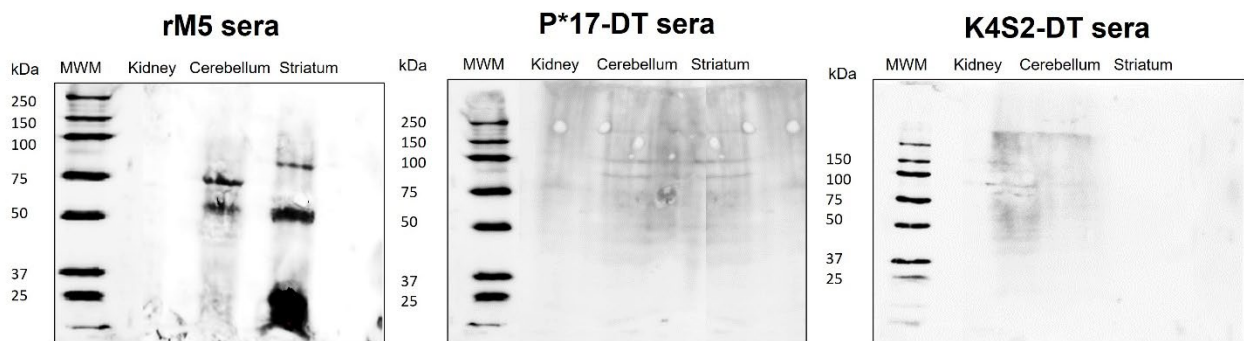

**Supplementary Figure 2.** Serum IgG cross-reactivity to host brain tissue. Serum IgG cross reactivity to endogenous proteins in lysates of cerebellum, striatum and kidney

(none-neuronal control) from naïve rats. Uncropped blots shown. MWM; molecular weight marker.
